# Supplementary material for: Pharmacological activation of AMPK and glucose uptake in cultured human skeletal muscle cells from patients with ME/CFS
Source: PubMed Central journal article supplement (PMC5938427; doi:10.1042/bsr20180242), 2018-05-08
Supplement: bsr20180242_Supp1.pdf [file bsr20180242_Supp1.pdf]

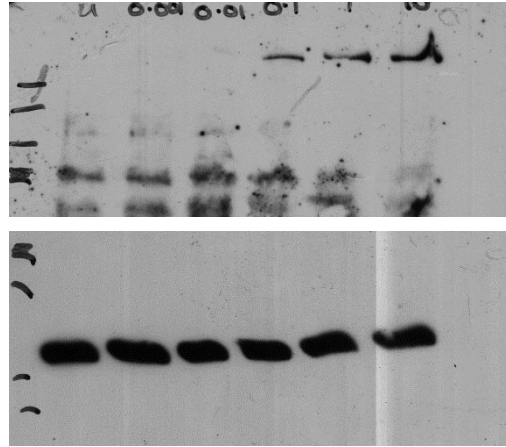

Supplementary Figure. Control myotubes treated with Compound 991 at 0, 0.001, 0.01, 0.1, 1, 10 μM. Top blot is Phospho-ACC and bottom blot is β-actin
